# Supplementary material for: Gene Expression Noise in Spatial Patterning: hunchback Promoter Structure Affects Noise Amplitude and Distribution in Drosophila Segmentation
Source: PLOS journal article supplement (doi:10.1371/journal.pcbi.1001069), 2011-02-03
Supplement: S13 (10.1371/journal.pcbi.1001069.s013) [file journal.pcbi.1001069.s013]

**Table S1: Relative intensities in different cases set production rates.**

| Number of Sites<br>(XBcd,YHb)                | Protein Concentration<br>(max, in molecules/nucleus) <sup>a</sup>                             | Transcription rates<br>(s <sup>-1</sup> )                         |
|----------------------------------------------|-----------------------------------------------------------------------------------------------|-------------------------------------------------------------------|
| <b>6B,2H</b><br><i>WT promoter</i>           | <b>7000</b>                                                                                   | 1 <sup>st</sup> Hb: $k_2=1e-1$<br>2 <sup>nd</sup> Hb: $k_5=3.1e0$ |
| <b>6B,0H</b><br><i>hb<sup>14F</sup></i>      | <b>1050</b><br>( <i>hb<sup>14F</sup></i> is 15% of WT expression<br>[30]; “Strong” from [34]) | $k_{22}, k_{25}=3.6e-1^b$                                         |
| <b>4B,0H</b><br><i>pThb11,13<sup>c</sup></i> | <b>210</b><br>(“Intermediate” from [34]; 1/5 of<br>“Strong” <sup>d</sup> )                    | $k_{19}=7.6e-2$                                                   |
| <b>3B,0H</b><br><i>pThb10,12</i>             | <b>140</b><br>(“Weak” from [34])                                                              | $k_{16}=5.2e-2^{e,f}$                                             |
| <b>1B,0H</b><br><i>pThb3</i>                 | <b>70</b><br>(“Very Weak” from [34]; 1/3 of<br>“Intermediate” <sup>d</sup> )                  | $k_{10}=3.6e-2$                                                   |

<sup>a</sup> RNA:protein ratio is set by the translation rate constant,  $k_{7A}=4e-1$ . The *hb* protein and mRNA decay constants ( $k_1$  and  $k_{7B}$ , respectively) are  $1.2e-1$ .

<sup>b</sup> Transcription rate set equal for 5 Bcd bound and 6 Bcd bound.

<sup>c</sup> pThb\_ are the lacZ constructs from [34].

<sup>d</sup> Relative expression values from *in vitro* [32].

<sup>e</sup> Production for 2 Bcd bound was interpolated,  $k_{13}=4.4e-2$ .

<sup>f</sup> For the pThb15 (2 times 3B) and pThb16 (3 times 3B) constructs,  $k_{16}$  was raised to  $1.8e-1$ , to match the stated “Strong” expression.
