# Supplementary material for: Gene Expression Noise in Spatial Patterning: hunchback Promoter Structure Affects Noise Amplitude and Distribution in Drosophila Segmentation
Source: PLOS journal article supplement (doi:10.1371/journal.pcbi.1001069), 2011-02-03
Supplement: S18 (10.1371/journal.pcbi.1001069.s018) [file journal.pcbi.1001069.s018]

301 Moved Permanently

# Moved Permanently

The document has moved here.

---

Apache Server at www.ploscompbiol.org Port 80
