# Supplementary material for: Gene Expression Noise in Spatial Patterning: hunchback Promoter Structure Affects Noise Amplitude and Distribution in Drosophila Segmentation
Source: PLoS Comput Biol. 2011 Feb 3;7(2):e1001069. doi: 10.1371/journal.pcbi.1001069 (PMC3033364; doi:10.1371/journal.pcbi.1001069)
Supplement: Table S2 — Bcd binding strengths. (0.04 MB PDF) [file pcbi.1001069.s014.pdf]

**Table S2 – Bcd binding strengths**

| <b>Model</b><br><i>Experiment</i>                                                   | <b>1A<sup>a</sup></b><br><i>pThb3</i> | <b>3A</b><br><i>pThb10</i> | <b>3X</b><br><i>pThb12</i> | <b>4A</b><br><i>pThb11</i> | <b>4X</b><br><i>pThb13</i> | <b>3A3X<sup>b</sup></b><br><i>hb<sup>14F</sup></i> | <b>2x(3X)<sup>c</sup></b><br><i>pThb15</i> | <b>3x(3X)<sup>d</sup></b><br><i>pThb16</i> |
|-------------------------------------------------------------------------------------|---------------------------------------|----------------------------|----------------------------|----------------------------|----------------------------|----------------------------------------------------|--------------------------------------------|--------------------------------------------|
| <b>Position of boundary</b><br>(%EL)                                                | <b>35</b>                             | <b>35</b>                  | <b>21</b>                  | <b>42</b>                  | <b>23</b>                  | <b>42</b>                                          | <b>28</b>                                  | <b>30</b>                                  |
| <b>Sharpness</b><br>(degrees)                                                       | <b>43</b>                             | <b>54</b>                  | <b>57</b>                  | <b>63</b>                  | <b>64</b>                  | <b>72</b>                                          | <b>62</b>                                  | <b>63</b>                                  |
| <b>1<sup>st</sup> Bcd binding</b><br>( $k_{11}$ , M <sup>-1</sup> s <sup>-1</sup> ) | 2.8e7                                 | 2.8e7                      | 1.09e7                     | 2.8e7                      | 1.09e7                     | 2.8e7                                              | 1.09e7                                     | 1.09e7                                     |
| <b>2<sup>nd</sup> Bcd</b><br>( $k_{14}$ )                                           |                                       | 3.6e7                      | 1.67e7                     | 3.6e7                      | 1.67e7                     | 3.6e7                                              | 1.67e7                                     | 1.67e7                                     |
| <b>3<sup>rd</sup> Bcd</b><br>( $k_{17}$ )                                           |                                       | 4.18e7                     | 1.94e7                     | 4.18e7                     | 1.94e7                     | 4.18e7                                             | 3e8                                        | 4e8                                        |
| <b>4<sup>th</sup> Bcd</b> ( $k_{20}$ )                                              |                                       |                            |                            | 4.25e8                     | 1.4e8                      | 1.4e8                                              |                                            |                                            |
| <b>5<sup>th</sup> Bcd</b> ( $k_{23}$ )                                              |                                       |                            |                            |                            |                            | 1.4e8                                              |                                            |                                            |
| <b>6<sup>th</sup> Bcd</b> ( $k_{26}$ )                                              |                                       |                            |                            |                            |                            | 1.4e8                                              |                                            |                                            |

These values are relative to unbinding rates ( $k_{12}$ ,  $k_{15}$ ,  $k_{18}$ ,  $k_{21}$ ,  $k_{24}$ ,  $k_{27}$ ) of 1/s. The model Bcd gradient was determined by  $k_8=3.5\text{e-}3$  and  $k_9=2\text{e-}3$ , set to match the experimentally measured shape [3], and by a Bcd diffusivity  $D_{\text{Bcd}}=20\mu\text{m}^2/\text{s}$  (embryo-scale value measured in [57]).

<sup>a</sup> A strong site, X weak site (see Figure 2A).

<sup>b</sup> The core Bcd sites of the proximal promoter, no Hb self-binding.

<sup>c</sup> 2 copies of the 3X sequence; the 3<sup>rd</sup> site of the 3X segment was strengthened to match experimental position.

<sup>d</sup> 3 copies of the 3X sequence; the 3<sup>rd</sup> site of the 3X segment was strengthened to match experimental position.
