# Supplementary material for: Gene Expression Noise in Spatial Patterning: hunchback Promoter Structure Affects Noise Amplitude and Distribution in Drosophila Segmentation
Source: PLoS Comput Biol. 2011 Feb 3;7(2):e1001069. doi: 10.1371/journal.pcbi.1001069 (PMC3033364; doi:10.1371/journal.pcbi.1001069)
Supplement: Table S3 — Hb binding strengths. (0.04 MB PDF) [file pcbi.1001069.s015.pdf]

**Table S3 – Hb binding strengths**

| <b>Model</b><br><i>Experiment</i>                                            | <b>3A3X, 2H</b><br><i>WT</i>                             | <b>6B2H_lacZ<sup>b</sup></b><br><i>pThb5</i> | <b>6B1H_lacZ</b><br><i>pThb1,6,9</i> | <b>2x(6B1H)_lacZ<sup>e</sup></b><br><i>pThb8</i> | <b>4B1H_lacZ<sup>f</sup></b><br><i>pThb2</i> |
|------------------------------------------------------------------------------|----------------------------------------------------------|----------------------------------------------|--------------------------------------|--------------------------------------------------|----------------------------------------------|
| <b>Position of boundary</b><br>(%EL)                                         | 47                                                       | 46                                           | 43                                   | 49                                               | 40                                           |
| <b>Sharpness</b><br>(degrees)                                                | 83 ( <i>protein</i> )<br>84 <sup>a</sup> ( <i>mRNA</i> ) | 78                                           | 71                                   | 75                                               | 52                                           |
| <b>1<sup>st</sup> Hb bind</b><br>( $k_3$ , M <sup>-1</sup> s <sup>-1</sup> ) | 4e6                                                      | 4e6                                          | 4e6 <sup>d</sup>                     | 4e6                                              | 4e6                                          |
| <b>2<sup>nd</sup> Hb (<math>k_6</math>)</b>                                  | 1e8                                                      | 1e8 <sup>c</sup>                             |                                      |                                                  |                                              |

Unbinding rates,  $k_4$  and  $k_7$ , are set to 1/s.

<sup>a</sup> WT protein sharpness is fit to data, mRNA sharpness is a model prediction. Hb diffusivity  $D_{Hb}=0.3\mu\text{m}^2/\text{s}$  (equal to the nuclear-resolution value measured in [41]) gives the best fit to experimental sharpness.

<sup>b</sup> Expression levels for simulations with Hb sites were higher, but never more than twice, that of 6B0H (Table S1).

<sup>c</sup> The transcription rate ( $k_5$ ) was dropped from 3.1 (WT) to 0.4, to match the loss of sharpness observed in this construct. Sharpnesses for the other constructs are model predictions.

<sup>d</sup> This value set by matching the posterior shift compared to  $hb^{14F}$ .

<sup>e</sup> 6<sup>th</sup> Bcd binding ( $k_{26}$ ) set to 1e9, to match experimental posterior shift with construct doubling.

<sup>f</sup> This construct has a truncated *hb* promoter: 1<sup>st</sup> Bcd ( $A_1$ ) binds at  $2.8e7$  ( $k_{11}$ ); 2<sup>nd</sup> Bcd ( $A_2$ ),  $3.6e7$  ( $k_{14}$ ); 3<sup>rd</sup> Bcd ( $X_1$ ),  $2.5e7$  ( $k_{17}$ ; slightly stronger than in 4X, to match position); 4<sup>th</sup> Bcd ( $X_2$ ),  $1.4e8$  ( $k_{20}$ ; as in 4X and WT).
